# Supplementary material for: The Impact of Robotics in Learning Roux-en-Y Gastric Bypass: a Retrospective Analysis of 214 Laparoscopic and Robotic Procedures: Robotic Vs. Laparoscopic RYGB
Source: PubMed Central journal article supplement (PMC7475058; doi:10.1007/s11695-020-04508-1), 2020-03-02
Supplement: 11695_2020_4508_MOESM1_ESM.pdf [file 11695_2020_4508_MOESM1_ESM.pdf]

| Nr | gender | age | BMI  | EOSS | procedure | operative time / min | ClavienDindo30d | LOS / d | %EWL 30d | BMI change 30d | %EWL 1 Year | BMI change 1 Year | Hb preoperative | Hb 1d | Hb 2d | Leucocytes preoperative | Leucocytes 1d | Leucocytes 2d | CRP preoperative | CRP 1d | CRP 2d | Docking / min |
|----|--------|-----|------|------|-----------|----------------------|-----------------|---------|----------|----------------|-------------|-------------------|-----------------|-------|-------|-------------------------|---------------|---------------|------------------|--------|--------|---------------|
| 1  | m      | 32  | 43,1 | 2    | LRYGB     | 115                  | 0               | 3       | 34,0%    | -6,2           | 105,9%      | -19,2             | 15,10           | 13,50 | 13,10 | 9,44                    | 12,09         | 10,26         | 5,39             | 46,80  | 59,50  |               |
| 2  | w      | 38  | 42,5 | 2    | LRYGB     | 126                  | I               | 4       | 24,9%    | -4,4           | 118,5%      | -20,7             | 13,70           | 13,00 | 13,40 | 10,21                   | 11,70         | 10,55         | 7,04             | 133,00 | 134,00 |               |
| 3  | w      | 37  | 55,6 | 2    | LRYGB     | 133                  | I               | 4       | 16,4%    | -5,0           | 72,7%       | -22,2             | 14,50           | 11,80 | 13,00 | 9,66                    | 8,63          | 7,99          | 10,40            | 140,00 | 128,00 |               |
| 4  | m      | 44  | 42,4 | 3    | LRYGB     | 123                  | 0               | 3       | 41,6%    | -7,2           | 98,6%       | -17,2             | 16,20           | 14,80 | 15,40 | 7,20                    | 8,43          | 7,67          | 0,55             | 16,60  | 25,00  |               |
| 5  | m      | 49  | 50,5 | 3    | LRYGB     | 120                  | 0               | 4       | 6,8%     | -1,7           | 38,0%       | -9,7              | 11,80           | 12,00 | 11,80 | 5,96                    | 9,24          | 7,26          | 1,12             | 14,00  | 48,00  |               |
| 6  | m      | 39  | 52,3 | 2    | LRYGB     | 160                  | 0               | 3       | 10,3%    | -2,8           | 33,1%       | -9,1              | 15,20           | 13,50 | 13,60 | 8,73                    | 13,20         | 10,15         | 18,40            | 87,10  | 110,00 |               |
| 7  | m      | 35  | 51,5 | 1    | LRYGB     | 125                  | IIIa            | 7       | 16,8%    | -4,5           | 43,0%       | -11,4             | 15,60           | 14,00 |       | 4,67                    | 7,70          |               | 3,73             | 23,80  |        |               |
| 8  | w      | 44  | 53,4 | 3    | LRYGB     | 106                  | 0               | 5       | 15,5%    | -4,4           | 45,2%       | -12,8             | 12,00           | 10,10 | 10,70 | 13,00                   | 11,22         | 9,83          | 50,60            | 111,00 | 101,00 |               |
| 9  | m      | 53  | 53,7 | 3    | LRYGB     | 150                  | 0               | 4       | 24,2%    | -6,9           | 62,0%       | -17,8             | 16,60           | 15,30 | 15,30 | 8,20                    | 9,71          | 10,47         | 7,24             | 58,20  | 152,00 |               |
| 10 | w      | 51  | 43,8 | 3    | LRYGB     | 112                  | 0               | 4       | 21,9%    | -4,1           | 72,9%       | -13,7             | 15,30           | 13,10 | 12,80 | 9,21                    | 9,12          | 14,81         | 3,80             | 11,70  | 134,00 |               |
| 11 | w      | 34  | 50,7 | 2    | LRYGB     | 203                  | II              | 7       | 16,6%    | -4,3           | 70,4%       | -18,1             | 14,50           | 13,90 | 12,60 | 11,59                   | 20,63         | 17,37         | 5,91             | 107,00 | 263,00 |               |
| 12 | w      | 52  | 47,3 | 2    | LRYGB     | 111                  | 0               | 5       | 27,7%    | -6,2           | 77,5%       | -17,3             | 15,30           | 12,90 | 13,70 | 9,05                    | 10,69         | 9,75          | 10,40            | 24,70  | 39,90  |               |
| 13 | w      | 60  | 49,7 | 3    | LRYGB     | 169                  | 0               | 5       | 23,3%    | -5,7           | 65,7%       | -16,2             | 14,50           | 11,70 | 12,40 | 9,69                    | 11,58         | 10,24         | 9,39             | 35,80  | 62,60  |               |
| 14 | w      | 45  | 50,7 | 3    | LRYGB     | 120                  | 0               | 5       | 15,1%    | -3,9           | 96,8%       | -24,9             | 12,90           | 12,00 | 12,30 | 8,37                    | 13,06         | 13,39         | 6,98             | 45,00  | 132,00 |               |
| 15 | w      | 44  | 46,7 | 1    | LRYGB     | 116                  | 0               | 5       | 15,6%    | -3,4           | 56,2%       | -12,2             | 11,70           | 10,50 | 10,50 | 6,05                    | 8,39          | 6,29          | 17,80            | 33,50  | 61,80  |               |
| 16 | w      | 46  | 48,8 | 3    | LRYGB     | 135                  | 0               | 5       | 15,5%    | -3,7           | 67,4%       | -16,0             | 12,50           | 10,50 | 9,50  | 5,10                    | 9,28          | 7,66          | 10,00            | 32,70  | 44,00  |               |
| 17 | w      | 48  | 46,3 | 2    | LRYGB     | 127                  | 0               | 4       | 30,0%    | -6,4           | 77,8%       | -16,6             | 13,80           | 11,10 | 10,00 | 4,36                    | 5,98          | 4,66          | 2,50             | 27,60  | 46,80  |               |
| 18 | w      | 35  | 41,3 | 3    | LRYGB     | 177                  | 0               | 4       | 22,3%    | -3,6           | 123,7%      | -20,1             | 14,10           | 12,70 | 11,80 | 6,44                    | 8,48          | 7,36          | 1,32             | 17,90  | 22,30  |               |
| 19 | w      | 52  | 46,5 | 2    | LRYGB     | 150                  | 0               | 4       | 31,2%    | -6,7           | 79,6%       | -17,1             | 12,90           | 12,30 | 10,30 | 14,31                   | 11,21         | 9,58          | 12,00            | 67,70  | 144,00 |               |
| 20 | w      | 53  | 51,9 | 3    | LRYGB     | 320                  | IVb             | 77      | 23,4%    | -6,3           | 65,2%       | -17,5             | 15,80           | 15,80 | 15,40 | 8,78                    | 12,62         | 11,68         | 20,80            | 118,00 | 147,00 |               |
| 21 | w      | 49  | 46,1 | 3    | LRYGB     | 101                  | 0               | 6       | 20,4%    | -4,3           | 61,1%       | -12,9             | 15,90           | 12,70 | 13,00 | 9,66                    | 15,23         | 9,34          | 27,60            | 48,00  | 46,60  |               |
| 22 | w      | 43  | 46,0 | 2    | LRYGB     | 153                  | 0               | 6       | 23,3%    | -4,9           | 79,1%       | -16,7             | 13,00           | 11,10 | 10,70 | 7,45                    | 11,49         | 9,67          | 14,30            | 41,80  | 93,10  |               |
| 23 | w      | 68  | 43,3 | 3    | LRYGB     | 103                  | IIIb            | 22      | 18,5%    | -3,4           | 37,1%       | -6,8              | 15,50           | 12,50 | 13,10 | 9,90                    | 10,33         | 15,10         | 14,50            | 111,00 | 408,00 |               |
| 24 | w      | 57  | 40,1 | 3    | LRYGB     | 134                  | 0               | 3       | 28,6%    | -4,3           | 71,4%       | -10,8             | 14,80           | 12,80 | 12,50 | 7,57                    | 8,03          | 6,96          | 10,50            | 40,60  | 56,70  |               |
| 25 | w      | 33  | 52,1 | 2    | LRYGB     | 134                  | 0               | 3       | 17,3%    | -4,7           | 95,5%       | -25,9             | 12,00           | 11,20 | 10,60 | 6,04                    | 5,62          | 4,86          | 6,25             | 25,60  | 23,40  |               |
| 26 | w      | 47  | 39,1 | 1    | LRYGB     | 118                  | 0               | 6       | 31,9%    | -4,5           | 77,2%       | -10,9             | 14,80           | 12,90 | 13,30 | 7,08                    | 9,46          | 8,55          | 6,57             | 27,10  | 40,30  |               |
| 27 | w      | 38  | 51,5 | 3    | LRYGB     | 114                  | 0               | 4       | 24,9%    | -6,6           | 51,1%       | -13,5             | 10,10           | 8,80  | 9,30  | 6,39                    | 6,85          | 5,35          | 6,46             | 32,00  | 43,50  |               |
| 28 | w      | 53  | 41,3 | 3    | LRYGB     | 196                  | IIIb            | 17      | 30,0%    | -4,9           | 40,8%       | -6,7              | 16,00           | 13,60 | 14,70 | 7,80                    | 9,94          | 16,34         | 14,50            | 99,20  | 297,00 |               |
| 29 | w      | 39  | 47,9 | 3    | LRYGB     | 137                  | I               | 5       | 20,9%    | -4,8           | 86,7%       | -19,8             | 13,30           | 12,00 | 10,90 | 6,85                    | 10,93         | 8,63          | 3,73             | 68,50  | 181,00 |               |
| 30 | w      | 30  | 47,7 | 1    | LRYGB     | 160                  | II              | 5       | 7,5%     | -1,7           | 59,7%       | -13,5             | 14,10           | 12,10 | 12,80 | 11,73                   | 12,46         | 13,97         | 23,70            | 59,30  | 133,00 |               |
| 31 | w      | 49  | 46,3 | 3    | LRYGB     | 138                  | IIIa            | 4       | 16,9%    | -3,6           | 84,3%       | -17,9             | 13,60           | 12,30 | 12,40 | 9,44                    | 14,24         | 11,52         | 16,10            | 33,80  | 45,50  |               |
| 32 | w      | 46  | 46,8 | 3    | LRYGB     | 113                  | 0               | 4       | 18,4%    | -4,0           | 92,1%       | -20,0             | 14,90           | 13,80 | 12,50 | 10,55                   | 13,28         | 8,70          | 21,60            | 24,30  | 41,80  |               |
| 33 | w      | 50  | 46,0 | 2    | LRYGB     | 106                  | II              | 10      | 19,8%    | -4,1           | 77,7%       | -16,3             | 13,70           | 10,40 | 10,60 | 7,96                    | 7,73          | 8,62          | 3,20             | 31,00  | 39,10  |               |
| 34 | w      | 46  | 42,9 | 2    | LRYGB     | 110                  | 0               | 4       | 18,9%    | -3,4           | 84,8%       | -15,2             | 14,30           | 13,00 | 13,40 | 6,64                    | 9,32          | 9,07          | 3,41             | 25,10  | 42,60  |               |
| 35 | w      | 47  | 48,9 | 1    | LRYGB     | 145                  | I               | 4       | 19,3%    | -4,6           |             |                   | 15,20           | 13,10 | 13,40 | 7,75                    | 6,98          | 6,48          | 10,60            | 85,70  | 123,00 |               |
| 36 | w      | 24  | 54,6 | 1    | LRYGB     | 150                  | 0               | 4       | 14,1%    | -4,2           | 56,4%       | -16,7             | 12,70           | 11,70 | 10,70 | 5,71                    | 8,26          | 6,08          | 3,91             | 36,40  | 68,20  |               |
| 37 | w      | 41  | 45,4 | 2    | LRYGB     | 134                  | 0               | 5       | 24,4%    | -5,0           |             |                   | 14,10           | 13,30 | 12,80 | 7,30                    | 10,50         | 9,98          | 6,73             | 42,80  | 86,60  |               |
| 38 | w      | 40  | 43,3 | 3    | LRYGB     | 103                  | IIIb            | 28      | 32,5%    | -5,9           | 74,1%       | -13,5             | 12,20           | 11,80 | 10,90 | 10,34                   | 16,12         | 14,50         | 27,00            | 255,00 | 353,00 |               |
| 39 | w      | 36  | 54,3 | 2    | LRYGB     | 125                  | 0               | 5       | 16,5%    | -4,8           | 88,5%       | -26,0             | 12,60           | 10,50 | 10,60 | 7,24                    | 10,05         | 8,82          | 12,10            | 50,20  | 121,00 |               |
| 40 | w      | 37  | 44,3 | 1    | LRYGB     | 175                  | 0               | 4       | 23,9%    | -4,6           | 106,5%      | -20,5             | 15,00           | 12,50 | 12,60 | 4,85                    | 6,97          | 6,85          | 0,70             | 35,60  | 70,00  |               |
| 41 | w      | 48  | 51,3 | 3    | LRYGB     | 124                  | II              | 5       | 17,0%    | -4,5           | 55,1%       | -14,5             | 13,00           | 11,90 | 12,00 | 9,35                    | 8,21          | 8,30          | 31,40            | 35,60  | 121,00 |               |
| 42 | w      | 45  | 42,4 | 3    | LRYGB     | 121                  | 0               | 4       | 18,1%    | -3,2           | 54,4%       | -9,5              | 13,70           | 12,90 | 13,10 | 8,10                    | 12,44         | 10,28         | 8,37             | 17,10  | 18,40  |               |
| 43 | w      | 48  | 43,9 | 3    | LRYGB     | 122                  | 0               | 5       | 23,2%    | -4,4           | 92,8%       | -17,6             | 15,10           | 13,10 | 13,50 | 6,45                    | 6,91          | 6,37          | 2,98             | 27,70  | 32,40  |               |
| 44 | w      | 45  | 49,1 | 2    | LRYGB     | 176                  | 0               | 5       | 17,8%    | -4,3           | 74,3%       | -17,9             | 15,30           | 14,10 | 14,10 | 7,00                    | 7,65          | 7,43          | 6,88             | 55,90  | 104,00 |               |
| 45 | w      | 34  | 47,1 | 2    | LRYGB     | 95                   | 0               | 4       | 26,9%    | -5,9           |             |                   | 14,80           | 13,60 | 13,50 | 8,80                    | 9,21          | 9,57          | 6,42             | 27,40  | 92,00  |               |
| 46 | w      | 41  | 48,9 | 3    | LRYGB     | 133                  | 0               | 4       | 15,7%    | -3,8           | 51,9%       | -12,4             | 13,40           | 10,60 | 11,70 | 9,70                    | 7,50          | 8,45          | 14,00            | 64,50  | 84,00  |               |
| 47 | w      | 33  | 48,7 | 2    | LRYGB     | 98                   | 0               | 3       | 13,7%    | -3,2           | 82,2%       | -19,5             | 14,90           | 12,40 | 13,70 | 8,11                    | 7,39          | 8,02          | 15,60            | 42,60  | 55,10  |               |
| 48 | w      | 56  | 49,7 | 3    | LRYGB     | 118                  | 0               | 3       | 15,0%    | -3,7           | 41,3%       | -10,2             | 15,50           | 13,90 | 13,80 | 6,39                    | 8,87          | 7,69          | 1,90             | 34,80  | 53,40  |               |
| 49 | w      | 30  | 46,0 | 2    | LRYGB     | 108                  | 0               | 3       | 23,5%    | -4,9           |             |                   | 10,60           | 9,70  | 9,20  | 9,69                    | 15,96         | 10,76         | 4,25             | 11,80  | 11,60  |               |
| 50 | w      | 44  | 44,6 | 3    | LRYGB     | 162                  | 0               | 4       | 20,3%    | -4,0           |             |                   | 13,40           | 12,00 | 12,70 | 8,82                    | 11,63         | 10,83         | 3,37             | 15,60  | 27,80  |               |
| 51 | w      | 51  | 51,9 | 2    | LRYGB     | 141                  | 0               | 5       | 12,3%    | -3,3           | 43,0%       | -11,6             | 15,30           | 11,80 | 12,20 | 8,58                    | 9,92          | 7,83          | 41,40            | 51,30  | 56,50  |               |
| 52 | w      | 41  | 43,4 | 3    | LRYGB     | 124                  | 0               | 4       | 19,5%    | -3,6           | 62,0%       | -11,4             | 13,50           | 12,90 | 13,30 | 9,06                    | 13,53         | 10,90         | 4,81             | 23,10  | 39,40  |               |
| 53 | w      | 36  | 39,7 | 2    | LRYGB     | 92                   | 0               | 5       | 43,7%    | -6,4           | 112,1%      | -16,4             | 14,30           | 12,30 | 12,60 | 8,09                    | 8,99          | 7,55          | 12,30            | 52,50  | 94,10  |               |
| 54 | w      | 48  | 51,3 | 3    | LRYGB     | 116                  | 0               | 5       | 9,9%     | -2,6           | 48,0%       | -12,6             | 15,40           | 13,80 | 13,50 | 11,48                   | 17,70         | 12,69         | 15,50            | 26,60  | 61,90  |               |
| 55 | w      | 34  | 48,9 | 2    | LRYGB     | 108                  | 0               | 4       | 12,6%    | -3,0           |             |                   | 13,20           | 12,10 | 11,70 | 9,92                    | 11,75         | 11,72         | 16,70            | 29,00  | 63,70  |               |
| 56 | w      | 36  | 56,8 | 2    | LRYGB     | 124                  | I               | 5       | 10,8%    | -3,4           | 42,0%       | -13,3             | 13,10           | 11,80 |       | 10,40                   | 10,71         |               | 26,00            | 62,50  | 120,00 |               |
| 57 | w      | 40  | 43,9 | 2    | LRYGB     | 103                  | 0               | 4       | 19,2%    | -3,6           | 89,0%       | -16,8             | 13,80           | 12,60 |       | 6,16                    | 9,43          |               | 2,67             | 19,30  |        |               |
| 58 | w      | 65  | 50,8 | 3    | LRYGB     | 118                  | IIIa            | 5       | 29,8%    | -7,7           | 46,9%       | -12,1             | 14,50           | 10,40 | 9,20  | 6,72                    | 7,96          | 6,33          | 3,56             | 23,30  | 49,00  |               |
| 59 | w      | 51  | 46,2 | 3    | LRYGB     | 122                  | I               | 4       | 23,8%    | -5,0           | 37,5%       | -8,0              | 14,20           | 14,20 | 13,50 | 11,06                   | 16,45         | 12,68         | 6,69             | 31,10  | 108,00 |               |
| 60 | w      | 30  | 46,1 | 2    | LRYGB     | 104                  | 0               | 4       | 18,0%    | -3,8           | 101,8%      | -21,5             | 14,70           | 13,00 | 12,50 | 7,66                    | 9,02          | 7,63          | 3,49             | 19,20  | 36,50  |               |
| 61 | w      | 53  | 48,5 | 1    | LRYGB     | 192                  | 0               | 4       | 23,9%    | -5,6           | 102,4%      | -24,0             | 15,50           | 13,70 | 13,60 | 7,70                    | 9,01          | 9,44          | 6,15             | 31,30  | 69,90  |               |
| 62 | w      | 57  | 42,6 | 4    | LRYGB     | 94                   | 0               | 5       | 28,9%    | -5,1           | 75,6%       | -13,3             | 13,50           | 11,40 | 12,00 | 4,87                    | 5,41          | 4,96          | 5,01             | 18,90  | 38,40  |               |
| 63 | w      | 42  | 55,1 | 1    | LRYGB     | 85                   | 0               | 4       | 14,6%    | -4,4           | 79,3%       | -23,9             | 14,30           | 12,80 | 12,90 | 9,10                    | 9,63          | 8,65          | 12,40            | 76,70  | 94,20  |               |
| 64 | w      | 29  | 48,0 | 2    | LRYGB     | 123                  | 0               | 5       | 24,8%    | -5,7           |             |                   |                 |       |       |                         |               |               |                  |        |        |               |

|     |   |    |      |   |       |     |      |    |       |      |        |       |       |       |       |       |       |       |       |       |        |    |
|-----|---|----|------|---|-------|-----|------|----|-------|------|--------|-------|-------|-------|-------|-------|-------|-------|-------|-------|--------|----|
| 70  | w | 42 | 47,2 | 3 | LRYGB | 185 | 0    | 5  | 15,5% | -3,4 | 55,4%  | -12,3 | 13,90 | 14,00 | 14,20 | 9,00  | 15,08 | 12,77 | 16,90 | 55,20 | 92,60  |    |
| 71  | w | 54 | 47,4 | 2 | LRYGB | 105 | I    | 5  | 13,9% | -3,1 | 63,3%  | -14,2 | 13,20 | 11,70 | 11,50 | 7,67  | 8,91  | 8,44  | 28,00 | 55,20 | 70,50  |    |
| 72  | w | 45 | 39,5 | 2 | LRYGB | 112 | 0    | 4  | 21,8% | -3,2 | 98,3%  | -14,2 | 15,00 | 14,90 | 11,90 | 5,02  | 11,36 | 7,27  | 2,38  | 22,60 | 28,50  |    |
| 73  | w | 35 | 53,1 | 2 | LRYGB | 122 | 0    | 4  | 15,7% | -4,4 | 75,9%  | -21,3 | 13,80 | 12,50 | 13,30 | 10,40 | 13,81 | 12,70 | 11,20 | 21,00 | 19,40  |    |
| 74  | w | 21 | 52,6 | 1 | LRYGB | 120 | 0    | 4  | 10,5% | -2,9 | 39,4%  | -10,9 | 15,20 | 12,20 | 12,80 | 9,82  | 14,93 | 9,91  | 6,32  | 11,10 | 23,80  |    |
| 75  | w | 32 | 53,2 | 1 | LRYGB | 98  | 0    | 4  | 13,9% | -3,9 | 55,5%  | -15,7 | 13,80 | 12,90 | 12,70 | 8,76  | 11,65 | 10,04 | 15,10 | 31,40 | 45,20  |    |
| 76  | w | 33 | 53,5 | 3 | LRYGB | 153 | 0    | 4  | 16,4% | -4,7 | 80,8%  | -23,0 | 14,80 | 12,40 | 12,20 | 6,94  | 11,04 | 8,50  | 3,78  | 26,40 | 24,70  |    |
| 77  | w | 57 | 42,5 | 2 | LRYGB | 206 | I    | 5  | 29,9% | -5,2 | 74,9%  | -13,1 | 15,00 | 13,20 | 12,30 | 7,53  | 14,27 | 11,20 | 8,22  | 96,90 | 147,00 |    |
| 78  | w | 32 | 53,9 | 2 | LRYGB | 158 | 0    | 4  | 12,9% | -3,7 | 64,3%  | -18,6 | 12,10 | 10,40 | 10,30 | 6,78  | 7,35  | 8,24  | 9,79  | 27,70 | 61,00  |    |
| 79  | m | 45 | 51,7 | 2 | LRYGB | 168 | 0    | 4  | 14,5% | -3,9 | 72,7%  | -19,4 | 15,70 | 13,70 | 13,60 | 5,54  | 8,06  | 6,71  | 2,21  | 33,60 | 56,70  |    |
| 80  | w | 36 | 56,2 | 2 | LRYGB | 139 | 0    | 4  | 15,3% | -4,8 | 65,9%  | -20,6 | 14,20 | 12,90 | 13,60 | 8,39  | 10,08 | 11,08 | 9,82  | 14,20 | 18,80  |    |
| 81  | w | 39 | 57,7 | 3 | LRYGB | 167 | 0    | 4  | 19,8% | -6,5 | 51,9%  | -17,0 | 18,20 | 17,10 | 16,80 | 7,77  | 13,85 | 11,80 | 3,77  | 12,90 | 58,80  |    |
| 82  | w | 43 | 53,7 | 3 | LRYGB | 189 | 0    | 5  | 18,2% | -5,2 | 83,8%  | -24,0 | 13,10 | 12,00 | 11,70 | 7,53  | 10,03 | 8,91  | 14,50 | 85,80 | 117,00 |    |
| 83  | w | 48 | 50,9 | 2 | LRYGB | 106 | 0    | 4  | 18,7% | -4,8 | 68,2%  | -17,6 | 13,70 | 11,30 |       | 12,09 | 8,13  |       | 15,30 | 22,70 |        |    |
| 84  | w | 44 | 47,7 | 2 | LRYGB | 170 | I    | 5  | 28,8% | -6,5 | 87,8%  | -19,9 | 14,80 | 13,70 | 12,90 | 11,54 | 18,03 | 16,18 | 10,00 | 92,00 | 207,00 |    |
| 85  | w | 33 | 52,6 | 2 | LRYGB | 149 | 0    | 4  | 15,0% | -4,2 | 90,2%  | -24,9 | 16,60 | 15,30 | 14,90 | 11,25 | 14,60 | 11,67 | 2,80  | 16,70 | 14,70  |    |
| 86  | w | 39 | 51,2 | 1 | LRYGB | 114 | 0    | 4  | 27,7% | -7,3 | 70,0%  | -18,3 | 13,40 | 12,50 | 11,90 | 7,76  | 10,36 | 8,32  | 7,52  | 25,00 | 61,50  |    |
| 87  | w | 31 | 45,3 | 1 | LRYGB | 108 | 0    | 4  | 14,1% | -2,9 | 59,7%  | -12,1 | 14,00 | 12,70 | 13,20 | 8,83  | 10,06 | 7,73  | 28,00 | 42,70 | 64,60  |    |
| 88  | w | 57 | 46,2 | 2 | LRYGB | 117 | 0    | 4  | 24,4% | -5,2 | 62,5%  | -13,2 | 16,00 | 14,30 | 14,10 | 10,09 | 13,44 | 9,96  | 17,60 | 57,30 | 61,60  |    |
| 89  | w | 26 | 51,0 | 2 | LRYGB | 76  | II   | 7  | 20,4% | -5,3 | 69,4%  | -18,1 | 13,10 | 11,80 | 12,70 | 9,59  | 12,07 | 12,50 | 17,20 | 69,90 | 109,00 |    |
| 90  | w | 33 | 45,8 | 3 | LRYGB | 99  | 0    | 4  | 26,3% | -5,5 | 92,5%  | -19,3 | 15,10 | 14,00 | 14,50 | 10,77 | 10,86 | 10,16 | 6,66  | 22,60 | 39,20  |    |
| 91  | w | 62 | 47,8 | 4 | LRYGB | 122 | 0    | 4  | 19,8% | -4,5 | 70,0%  | -15,9 | 15,00 | 12,40 | 12,30 | 8,28  | 9,45  | 7,18  | 4,61  |       | 37,10  |    |
| 92  | w | 38 | 45,9 | 3 | LRYGB | 105 | 0    | 5  | 18,2% | -3,8 | 58,8%  | -12,3 | 15,20 | 13,50 | 13,20 | 5,80  | 8,44  | 7,18  | 3,51  | 34,00 | 42,40  |    |
| 93  | w | 46 | 52,5 | 2 | LRYGB | 97  | 0    | 4  | 15,6% | -4,3 | 61,2%  | -16,8 | 15,40 | 13,10 | 13,80 | 9,59  | 10,91 | 9,35  | 2,96  | 31,90 | 32,40  |    |
| 94  | w | 54 | 41,5 | 3 | LRYGB | 98  | 0    | 5  | 35,7% | -5,9 | 63,4%  | -10,4 | 16,40 | 15,60 | 14,70 | 9,64  | 13,54 | 10,37 | 5,63  | 23,80 | 27,50  |    |
| 95  | w | 28 | 38,0 | 3 | LRYGB | 112 | 0    | 4  | 17,8% | -2,3 | 94,1%  | -12,2 | 14,50 | 13,40 | 13,10 | 9,36  | 9,49  | 8,67  | 9,85  | 46,40 | 82,40  |    |
| 96  | w | 49 | 42,1 | 3 | LRYGB | 118 | I    | 6  | 33,2% | -5,7 | 76,2%  | -13,0 | 13,50 | 9,80  | 9,80  | 10,52 | 9,82  | 7,73  | 6,43  | 35,40 | 44,70  |    |
| 97  | w | 32 | 48,3 | 3 | LRYGB | 111 | 0    | 3  | 14,0% | -3,3 | 67,2%  | -15,7 | 15,20 | 13,00 | 13,10 | 6,03  | 7,70  | 7,00  | 7,47  | 32,40 | 53,10  |    |
| 98  | w | 36 | 48,6 | 2 | LRYGB | 87  | 0    | 4  | 21,8% | -5,1 | 63,9%  | -15,0 | 14,90 | 13,70 | 15,50 | 6,97  | 9,30  | 9,24  | 0,92  | 8,84  | 11,50  |    |
| 99  | w | 50 | 40,0 | 1 | LRYGB | 87  | 0    | 4  | 18,9% | -2,8 | 91,9%  | -13,8 | 14,60 | 12,60 |       | 9,84  | 14,32 |       | 6,08  | 41,30 |        |    |
| 100 | w | 29 | 47,7 | 2 | LRYGB | 86  | 0    | 5  | 13,4% | -3,0 |        |       | 11,70 | 10,70 | 10,10 | 7,17  | 6,42  | 4,75  | 15,20 | 22,30 | 15,80  |    |
| 101 | w | 34 | 44,6 | 1 | LRYGB | 108 | 0    | 4  | 18,0% | -3,5 |        |       | 13,80 | 11,20 | 10,90 | 7,58  | 10,57 | 10,47 | 2,41  | 29,40 | 40,70  |    |
| 102 | w | 38 | 49,6 | 1 | LRYGB | 118 | 0    | 5  | 13,3% | -3,3 |        |       | 12,90 | 10,90 |       | 6,22  | 12,03 |       | 1,55  | 14,70 |        |    |
| 103 | w | 35 | 45,5 | 2 | LRYGB | 102 | 0    | 3  | 20,5% | -4,2 |        |       | 14,90 | 12,80 | 12,90 | 5,39  | 9,00  | 7,08  | 1,99  | 19,70 | 44,60  |    |
| 104 | w | 44 | 41,3 | 3 | LRYGB | 119 | 0    | 3  | 25,0% | -4,1 |        |       | 16,30 | 14,50 | 15,00 | 8,40  | 8,66  | 8,10  | 1,86  | 64,30 | 104,00 |    |
| 105 | w | 53 | 47,0 | 3 | LRYGB | 103 | 0    | 4  | 20,0% | -4,4 |        |       | 14,40 |       | 13,30 | 9,06  |       | 9,35  | 10,60 | 38,00 | 60,10  |    |
| 106 | w | 29 | 55,3 | 1 | LRYGB | 93  | 0    | 4  | 11,9% | -3,6 |        |       | 12,40 | 10,70 | 10,30 | 9,38  | 10,72 | 9,27  | 23,80 | 21,90 | 22,20  |    |
| 107 | w | 39 | 49,1 | 1 | LRYGB | 104 | 0    | 4  | 22,3% | -5,4 |        |       | 15,20 | 14,60 | 14,90 | 6,60  | 10,97 | 10,18 | 3,25  | 21,30 | 30,30  |    |
| 108 | w | 52 | 42,9 | 3 | LRYGB | 120 | IIIa | 4  | 18,9% | -3,4 |        |       | 14,40 | 13,6  | 13,00 | 8,24  | 8,88  | 6,66  | 13,50 | 37,70 | 45,80  |    |
| 1   | w | 38 | 41,4 | 3 | RRYGB | 149 | 0    | 4  | 35,5% | -5,8 | 116,9% | -19,2 | 14,20 | 11,70 | 11,70 | 9,37  | 14,02 | 10,62 | 5,96  | 43,80 | 55,10  | 22 |
| 2   | w | 51 | 37,6 | 2 | RRYGB | 134 | 0    | 4  | 26,7% | -3,3 | 91,8%  | -11,5 | 14,10 | 12,30 | 13,20 | 6,72  | 9,16  | 11,99 | 5,13  | 44,80 | 106,00 | 11 |
| 3   | w | 34 | 51,6 | 2 | RRYGB | 141 | 0    | 5  | 14,7% | -3,9 | 63,5%  | -16,9 | 15,20 | 14,00 | 13,10 | 7,48  | 11,16 | 9,14  | 3,55  | 49,60 | 52,20  | 27 |
| 4   | m | 50 | 40,0 | 4 | RRYGB | 172 | IIIa | 4  | 33,8% | -5,1 | 83,5%  | -12,5 | 16,60 | 14,50 | 15,20 | 8,14  | 8,39  | 7,82  | 4,18  | 18,00 | 42,20  | 10 |
| 5   | w | 33 | 50,0 | 2 | RRYGB | 141 | 0    | 4  | 21,3% | -5,3 | 92,3%  | -23,0 | 11,60 | 11,30 | 10,10 | 10,88 | 17,80 | 12,77 | 23,80 | 28,10 | 76,10  | 14 |
| 6   | m | 51 | 45,2 | 1 | RRYGB | 117 | 0    | 4  | 19,2% | -3,9 | 67,4%  | -13,6 | 14,70 | 13,30 | 13,70 | 6,59  | 7,81  | 7,07  | 1,96  | 21,90 | 37,40  | 8  |
| 7   | w | 42 | 52,3 | 2 | RRYGB | 157 | 0    | 5  | 20,1% | -5,5 | 68,6%  | -18,7 | 14,80 | 13,10 | 13,50 | 6,76  | 12,87 | 11,49 | 3,97  | 22,10 | 23,70  | 11 |
| 8   | w | 45 | 45,8 | 3 | RRYGB | 191 | IVa  | 40 | 22,5% | -4,7 | 85,2%  | -17,7 | 14,80 | 13,70 | 14,60 | 9,01  | 11,84 | 4,02  | 6,31  | 13,20 | 20,80  | 11 |
| 9   | w | 31 | 54,1 | 3 | RRYGB | 163 | 0    | 5  | 17,5% | -5,1 | 58,7%  | -17,1 | 14,10 | 11,00 | 11,30 | 5,72  | 8,10  | 7,29  | 0,30  |       | 34,80  | 16 |
| 10  | w | 54 | 50,4 | 3 | RRYGB | 146 | 0    | 4  | 13,3% | -3,4 | 34,0%  | -8,7  | 15,00 | 12,80 | 11,60 | 7,34  | 9,86  | 8,40  | 0,88  | 23,10 | 20,10  | 7  |
| 11  | w | 47 | 53,2 | 1 | RRYGB | 127 | 0    | 4  | 19,5% | -5,5 | 49,6%  | -14,0 | 14,30 | 13,90 | 14,00 | 6,80  | 8,67  | 6,91  | 8,79  | 24,40 | 40,70  | 19 |
| 12  | w | 56 | 46,8 | 3 | RRYGB | 147 | 0    | 4  | 13,3% | -2,9 | 53,3%  | -11,6 | 14,10 | 12,80 | 12,60 | 7,45  | 9,72  | 6,31  | 8,96  | 34,20 | 27,20  | 13 |
| 13  | w | 40 | 46,7 | 2 | RRYGB | 158 | 0    | 3  | 11,9% | -2,6 | 61,1%  | -13,2 | 13,90 | 11,20 | 10,60 | 6,83  | 7,27  | 5,68  | 7,85  | 44,50 | 47,00  | 13 |
| 14  | w | 50 | 51,4 | 2 | RRYGB | 111 | 0    | 4  | 24,2% | -6,4 | 61,8%  | -16,3 | 8,50  | 8,20  | 8,00  | 11,11 | 12,15 | 10,47 | 4,24  | 39,80 | 61,80  | 15 |
| 15  | w | 45 | 48,5 | 2 | RRYGB | 177 | 0    | 4  | 18,1% | -4,3 | 55,7%  | -13,1 | 11,90 | 9,50  | 8,30  | 11,34 | 18,00 | 14,31 | 4,94  | 49,60 | 48,80  | 8  |
| 16  | w | 51 | 38,9 | 2 | RRYGB | 127 | 0    | 2  | 37,4% | -5,2 | 106,3% | -14,8 | 14,80 | 13,20 | 12,90 | 6,44  | 11,24 | 8,56  | 3,89  | 39,40 | 53,00  | 8  |
| 17  | w | 69 | 44,8 | 3 | RRYGB | 126 | 0    | 4  | 29,7% | -5,9 | 56,3%  | -11,1 | 13,90 | 12,60 | 13,00 | 5,72  | 9,88  | 6,49  | 6,68  | 30,90 | 35,70  | 12 |
| 18  | w | 51 | 46,9 | 2 | RRYGB | 105 | I    | 5  | 23,2% | -5,1 | 71,4%  | -15,6 | 13,80 | 10,30 | 9,40  | 8,60  | 9,02  | 6,49  | 6,23  | 22,40 | 43,60  | 8  |
| 19  | w | 51 | 52,1 | 2 | RRYGB | 115 | IIIb | 8  | 15,0% | -4,1 | 51,2%  | -13,9 | 14,60 | 13,00 | 13,50 | 11,05 | 12,24 | 14,01 | 11,80 | 41,00 | 208,00 | 12 |
| 20  | w | 61 | 44,1 | 3 | RRYGB | 123 | I    | 5  | 17,7% | -3,4 | 66,1%  | -12,7 | 13,80 | 12,20 | 13,80 | 9,87  | 10,42 | 13,18 | 10,20 | 46,90 | 108,00 | 5  |
| 21  | w | 28 | 48,7 | 3 | RRYGB | 143 | 0    | 4  | 40,1% | -9,5 | 93,6%  | -22,2 | 13,10 | 12,20 | 12,20 | 7,77  | 10,60 | 8,23  | 10,10 |       | 54,00  | 8  |
| 22  | w | 52 | 39,8 | 3 | RRYGB | 167 | 0    | 4  | 18,4% | -2,7 | 89,5%  | -13,3 | 15,30 |       | 13,40 | 11,49 |       | 12,81 | 7,12  |       | 40,40  | 6  |
| 23  | w | 34 | 49,7 | 3 | RRYGB | 91  | 0    | 4  | 18,4% | -4,6 | 76,5%  | -18,9 | 15,10 | 13,20 | 13,10 | 9,21  | 14,35 | 10,78 | 1,95  | 12,70 | 14,50  | 8  |
| 24  | w | 26 | 49,1 | 2 | RRYGB | 141 | 0    | 4  | 21,5% | -5,2 | 64,5%  | -15,6 | 14,10 | 11,20 | 11,20 | 7,69  | 10,64 | 9,02  | 25,90 | 49,90 | 45,00  | 5  |
| 25  | w | 53 | 48,4 | 3 | RRYGB | 125 | 0    | 4  | 12,6% | -3,0 | 86,9%  | -20,4 | 15,60 | 13,90 | 14,20 | 5,86  | 10,40 | 8,76  | 2,05  | 31,50 | 22,80  | 14 |
| 26  | w | 41 | 38,8 | 4 | RRYGB | 103 | 0    | 4  | 47,8% | -6,6 |        |       | 11,90 | 10,30 | 10,00 | 12,75 | 12,70 |       |       |       |        |    |

|     |   |    |      |   |       |     |    |   |         |      |        |       |       |       |       |       |       |       |       |       |        |    |
|-----|---|----|------|---|-------|-----|----|---|---------|------|--------|-------|-------|-------|-------|-------|-------|-------|-------|-------|--------|----|
| 39  | w | 37 | 41,7 | 3 | RRYGB | 83  | 0  | 5 | 17,3%   | -2,9 | 99,8%  | -16,7 | 14,40 | 13,00 | 12,50 | 7,33  | 8,01  | 6,75  | 4,97  | 35,30 | 40,80  | 6  |
| 40  | w | 33 | 40,1 | 2 | RRYGB | 83  | 0  | 4 | 13,3%   | -2,0 | 77,5%  | -11,7 | 13,20 | 12,20 | 12,50 | 8,30  | 10,44 | 11,80 | 22,00 | 54,20 | 109,00 | 7  |
| 41  | w | 25 | 46,6 | 2 | RRYGB | 90  | 0  | 4 | 12,2%   | -2,6 | 65,8%  | -14,2 | 11,70 | 10,50 | 10,40 | 5,59  | 7,23  | 6,75  | 8,59  | 30,90 | 56,40  | 6  |
| 42  | w | 52 | 47,3 | 3 | RRYGB | 228 | 0  | 5 | 25,2%   | -5,6 |        |       | 14,80 | 13,20 | 13,20 | 8,60  | 11,41 | 10,46 | 3,75  | 39,50 | 89,10  | 4  |
| 43  | w | 53 | 41,2 | 2 | RRYGB | 95  | 0  | 4 | 33,6%   | -5,4 |        |       | 12,80 | 12,20 | 12,80 | 8,79  | 8,96  | 7,24  | 16,40 | 40,30 | 36,80  | 3  |
| 44  | m | 39 | 48,3 | 2 | RRYGB | 111 | 0  | 4 | 24,8%   | -5,8 | 86,9%  | -20,2 | 15,90 | 12,60 | 11,00 | 6,94  | 10,54 | 10,29 | 2,16  | 20,80 | 41,90  | 4  |
| 45  | w | 46 | 47,8 | 2 | RRYGB | 96  | 0  | 4 | 16,1%   | -3,7 | 88,8%  | -20,2 | 12,90 | 12,10 | 10,90 | 7,06  | 13,50 | 8,39  | 16,70 | 17,30 | 12,50  | 6  |
| 46  | w | 19 | 53,3 | 2 | RRYGB | 110 | 0  | 4 | 15,6%   | -4,4 |        |       | 13,90 | 12,10 | 11,60 | 6,83  | 8,65  | 9,18  | 20,40 | 58,50 | 66,50  | 4  |
| 47  | w | 52 | 44,3 | 2 | RRYGB | 95  | 0  | 3 | 18,8%   | -3,6 | 81,0%  | -15,6 | 14,20 | 14,00 | 13,90 | 6,91  | 11,12 | 9,36  | 6,17  | 33,70 | 53,40  | 5  |
| 48  | w | 23 | 53,8 | 2 | RRYGB | 110 | I  | 4 | 5,0%    | -1,4 | 58,3%  | -16,8 | 12,80 | 11,60 | 11,50 | 8,88  | 10,28 | 8,26  | 21,40 | 53,00 | 82,80  | 3  |
| 49  | w | 40 | 45,7 | 3 | RRYGB | 106 | 0  | 4 | 25,1%   | -5,2 | 58,6%  | -12,1 | 16,10 | 13,20 | 12,70 | 12,48 | 14,09 | 8,89  | 9,51  | 17,50 | 30,60  | 4  |
| 50  | w | 38 | 44,0 | 1 | RRYGB | 115 | 0  | 4 | 7,9%    | -1,5 | 77,1%  | -14,7 | 13,40 | 11,90 | 12,00 | 7,38  | 11,70 | 7,88  | 4,44  | 17,60 | 24,70  | 4  |
| 51  | w | 21 | 45,9 | 1 | RRYGB | 77  | 0  | 4 | 23,7%   | -5,0 |        |       | 13,80 | 10,90 | 10,80 | 8,19  | 7,67  | 4,63  | 12,40 | 41,30 | 60,30  | 3  |
| 52  | w | 60 | 50,0 | 4 | RRYGB | 127 | 0  | 5 | 16,2%   | -4,1 |        |       | 14,00 | 11,50 | 11,90 | 10,43 | 11,30 | 8,67  | 19,30 | 28,00 | 65,00  | 9  |
| 53  | w | 33 | 49,3 | 3 | RRYGB | 100 | 0  | 5 | 24,3%   | -5,9 | 93,6%  | -22,8 | 12,40 | 10,90 | 12,30 | 4,94  | 5,58  | 6,29  | 3,99  | 42,30 | 44,50  | 5  |
| 54  | w | 30 | 46,5 | 2 | RRYGB | 72  | 0  | 4 | 20,5%   | -4,4 | 80,2%  | -17,2 | 13,90 | 12,60 | 12,60 | 8,45  | 9,87  | 8,70  | 2,70  | 24,00 | 44,90  | 4  |
| 55  | w | 43 | 52,1 | 3 | RRYGB | 119 | 0  | 4 | 16,2%   | -4,4 | 55,0%  | -14,9 | 14,50 | 14,00 | 13,00 | 8,36  | 13,87 | 10,32 | 2,20  | 12,50 | 20,00  | 6  |
| 56  | w | 47 | 44,8 | 1 | RRYGB | 82  | 0  | 4 | 24,1%   | -4,8 | 80,0%  | -15,8 | 13,70 | 11,20 | 11,40 | 6,78  | 11,92 | 6,94  | 3,40  | 60,60 | 57,80  | 4  |
| 57  | w | 30 | 45,3 | 1 | RRYGB | 136 | 0  | 2 | 26,2%   | -5,3 | 91,8%  | -18,7 | 14,50 | 12,90 | 12,80 | 10,98 | 13,32 | 11,32 | 9,12  | 42,20 | 45,20  | 6  |
| 58  | w | 44 | 42,6 | 2 | RRYGB | 98  | 0  | 5 | 26,9%   | -4,7 | 104,0% | -18,3 | 13,40 | 11,40 | 11,90 | 9,26  | 12,40 | 9,42  | 6,20  | 16,70 | 28,40  | 5  |
| 59  | w | 49 | 47,3 | 3 | RRYGB | 132 | 0  | 3 | 17,0%   | -3,8 | 63,6%  | -14,2 | 14,00 | 12,60 | 11,80 | 5,11  | 8,81  | 7,05  | 3,97  | 34,50 | 20,30  | 5  |
| 60  | w | 46 | 48,9 | 3 | RRYGB | 128 | 0  | 4 | 20,6%   | -4,9 | 72,2%  | -17,3 | 13,40 | 12,70 | 12,90 | 8,05  | 13,45 | 9,03  | 3,61  | 19,70 | 19,50  | 7  |
| 61  | w | 43 | 38,8 | 4 | RRYGB | 81  | 0  | 5 | 19,4%   | -2,7 | 80,1%  | -11,0 | 13,00 | 12,10 | 11,80 | 10,16 | 12,91 | 7,13  | 2,59  | 12,30 | 31,80  | 4  |
| 62  | w | 67 | 51,3 | 3 | RRYGB | 172 | 0  | 4 | 15,5%   | -4,1 | 50,9%  | -13,4 | 13,20 | 12,60 |       | 9,84  | 13,89 |       | 12,10 | 55,90 |        | 7  |
| 63  | w | 40 | 42,2 | 3 | RRYGB | 97  | 0  | 4 | 28,5%   | -4,9 |        |       | 12,60 | 12,40 | 12,50 | 11,14 | 18,08 | 10,89 | 2,50  | 7,24  | 18,60  | 8  |
| 64  | w | 47 | 45,0 | 3 | RRYGB | 100 | 0  | 4 | 23,4%   | -4,7 | 55,9%  | -11,2 | 16,70 | 16,00 | 16,70 | 9,10  | 11,44 | 14,26 | 10,00 | 29,60 | 96,70  | 7  |
| 65  | w | 21 | 52,0 | 1 | RRYGB | 156 | 0  | 4 | 17,7%   | -4,8 | 60,8%  | -16,4 | 13,40 | 12,20 | 11,70 | 8,18  | 11,52 | 8,47  | 16,60 | 35,30 | 29,10  | 4  |
| 66  | w | 59 | 37,6 | 2 | RRYGB | 147 | 0  | 4 | 14,1%   | -1,8 | 110,0% | -13,8 | 13,30 | 11,80 | 12,40 | 4,74  | 7,31  | 6,75  | 47,40 | 30,40 | 72,80  |    |
| 67  | w | 45 | 43,3 | 3 | RRYGB | 123 | 0  | 5 | 32,9%   | -6,0 | 92,6%  | -16,9 | 13,30 | 10,80 | 11,20 | 6,53  | 9,03  | 7,56  | 5,02  | 25,30 | 47,60  | 6  |
| 68  | w | 24 | 57,0 | 2 | RRYGB | 128 | I  | 4 | 20,7%   | -6,6 |        |       | 15,00 | 12,30 | 12,30 | 5,45  | 9,50  | 7,90  | 8,88  | 94,50 | 138,00 | 1  |
| 69  | w | 44 | 44,6 | 3 | RRYGB | 297 | 0  | 5 | 15,9%   | -3,1 | 51,1%  | -10,0 | 14,90 | 12,40 | 13,00 | 7,16  | 11,40 | 7,73  | 14,70 | 36,30 | 43,70  |    |
| 70  | w | 52 | 36,2 | 3 | RRYGB | 80  | 0  | 5 | 18,6%   | -2,1 | 59,4%  | -6,7  | 13,70 | 13,90 | 11,70 | 7,13  | 10,97 | 5,40  | 7,95  | 25,80 | 28,40  |    |
| 71  | w | 41 | 46,0 | 2 | RRYGB | 106 | 0  | 4 | 21,4%   | -4,5 | 90,5%  | -19,0 | 13,50 | 11,90 | 11,90 | 8,09  | 11,47 | 10,35 | 1,98  | 34,80 | 35,90  |    |
| 72  | w | 44 | 48,8 | 3 | RRYGB | 123 | 0  | 4 | 25,6%   | -6,1 | 80,1%  | -19,1 | 12,50 | 11,60 | 11,60 | 8,89  | 15,52 | 10,72 | 4,20  | 21,70 | 47,10  | 4  |
| 73  | w | 42 | 43,0 | 3 | RRYGB | 103 | 0  | 4 | 29,9%   | -5,4 |        |       | 16,30 | 13,20 | 12,30 | 14,53 | 15,74 | 13,22 | 3,21  | 33,60 | 42,10  | 4  |
| 74  | w | 39 | 46,1 | 2 | RRYGB | 100 | 0  | 4 | 20,7%   | -4,4 |        |       | 13,90 | 12,60 | 11,80 | 6,01  | 10,41 | 6,75  | 10,70 | 25,30 | 37,30  | 3  |
| 75  | w | 27 | 43,6 | 2 | RRYGB | 130 | 0  | 3 | 23,0%   | -4,3 | 78,2%  | -14,5 | 12,40 | 10,80 | 11,50 | 6,87  | 11,11 | 10,10 | 1,34  | 12,70 | 47,30  |    |
| 76  | w | 41 | 47,3 | 2 | RRYGB | 93  | 0  | 3 | 21,2%   | -4,7 |        |       | 15,40 | 12,40 | 13,40 | 5,50  | 9,71  | 7,92  | 2,10  | 20,10 | 41,30  | 5  |
| 77  | w | 42 | 45,5 | 1 | RRYGB | 156 | 0  | 4 | 26,7%   | -5,5 | 91,3%  | -18,7 | 10,80 | 8,80  | 8,40  | 6,79  | 9,83  | 7,67  | 6,91  | 20,60 | 31,50  | 5  |
| 78  | w | 38 | 46,0 | 2 | RRYGB | 86  | 0  | 4 | 18,3%   | -3,8 | 68,5%  | -14,4 | 13,60 | 10,40 | 9,60  | 6,78  | 9,11  | 6,92  | 11,60 | 26,10 | 61,50  | 4  |
| 79  | w | 45 | 57,3 | 3 | RRYGB | 157 | 0  | 4 | 8,2%    | -2,7 | 49,4%  | -15,9 | 14,00 | 13,20 | 11,40 | 6,29  | 10,59 | 7,06  | 8,26  | 47,00 | 88,10  | 5  |
| 80  | w | 26 | 53,2 | 2 | RRYGB | 112 | 0  | 3 | 15,1%   | -4,3 |        |       | 13,50 | 12,80 | 10,60 | 9,45  | 10,77 | 15,95 | 4,77  | 31,50 | 69,30  | 3  |
| 81  | w | 52 | 49,2 | 3 | RRYGB | 103 | I  | 3 | 22,6%   | -5,5 | 41,9%  | -10,2 | 11,00 | 10,50 | 11,00 | 7,55  | 11,39 | 9,43  | 14,80 | 31,80 | 72,50  | 4  |
| 82  | w | 52 | 55,9 | 2 | RRYGB | 126 | 0  | 4 | 14,1%   | -4,4 |        |       | 13,20 | 11,50 | 12,30 | 6,04  | 8,42  | 6,59  | 7,85  | 37,30 | 55,00  | 2  |
| 83  | w | 52 | 40,9 | 2 | RRYGB | 75  | 0  | 4 | 22,6%   | -3,6 |        |       | 12,20 | 12,10 | 11,20 | 4,92  | 8,37  | 5,90  | 8,25  | 14,20 | 16,20  | 4  |
| 84  | w | 33 | 48,1 | 2 | RRYGB | 87  | 0  | 3 | 15,9%   | -3,7 | 41,9%  | -9,7  | 13,30 | 13,10 | 12,90 | 7,01  | 9,38  | 8,18  | 5,74  | 18,20 | 34,50  | 4  |
| 85  | w | 27 | 42,2 | 3 | RRYGB | 76  | 0  | 4 | 9,4%    | -1,6 | 90,8%  | -15,6 | 12,40 | 11,90 | 13,10 | 6,73  | 10,20 | 7,85  | 4,87  | 15,40 | 13,30  | 4  |
| 86  | w | 24 | 48,9 | 2 | RRYGB | 117 | 0  | 4 | 33,0%   | -7,9 |        |       | 13,70 | 12,40 | 12,90 | 8,72  | 15,85 | 10,67 | 2,07  | 17,40 | 31,10  | 5  |
| 87  | w | 42 | 46,7 | 1 | RRYGB | 95  | 0  | 4 | 18,7%   | -4,0 |        |       | 14,40 | 12,40 | 12,50 | 9,07  | 11,13 | 7,38  | 3,42  | 14,70 | 15,70  | 4  |
| 88  | w | 48 | 50,3 | 2 | RRYGB | 83  | 0  | 4 | 16,6%   | -4,2 |        |       | 11,40 | 10,20 | 10,00 | 4,35  | 6,70  | 5,97  | 1,45  | 33,40 | 44,60  | 4  |
| 89  | w | 35 | 51,0 | 3 | RRYGB | 90  | 0  | 3 | 16,3%   | -4,3 |        |       | 13,10 | 10,60 |       | 9,01  | 11,50 |       | 11,10 | 19,70 |        | 5  |
| 90  | w | 35 | 41,9 | 2 | RRYGB | 112 | II | 4 | 21,0%   | -3,6 |        |       | 12,70 | 10,70 | 10,50 | 5,49  | 9,23  | 7,49  | 11,20 | 30,20 | 70,50  | 6  |
| 91  | w | 31 | 49,9 | 2 | RRYGB | 111 | 0  | 3 | 18,9%   | -4,7 |        |       | 15,60 | 14,30 |       | 5,80  | 7,76  |       | 9,52  | 34,10 |        | 11 |
| 92  | w | 26 | 50,7 | 1 | RRYGB | 76  | 0  | 3 | 3,6%    | -0,9 |        |       | 13,00 | 11,60 | 11,20 | 5,79  | 5,65  | 4,00  | 4,46  | 10,80 | 11,60  | 3  |
| 93  | w | 49 | 53,4 | 3 | RRYGB | 154 | 0  | 3 | 15,2%   | -4,3 |        |       | 15,40 | 14,50 | 14,20 | 5,37  | 11,06 | 9,06  | 5,97  | 16,40 | 46,10  | 6  |
| 94  | w | 43 | 35,6 | 3 | RRYGB | 94  | 0  | 4 | 34,6%   | -3,7 |        |       | 14,70 | 10,80 | 10,40 | 7,71  | 11,78 | 9,48  | 19,60 | 47,10 | 69,50  | 4  |
| 95  | w | 22 | 54,4 | 2 | RRYGB | 140 | 0  | 3 | 20,9%   | -6,1 |        |       | 15,70 | 13,60 | 13,40 | 10,74 | 14,47 | 9,17  | 7,10  | 18,00 | 14,30  | 2  |
| 96  | w | 46 | 49,5 | 2 | RRYGB | 94  | 0  | 4 | 16,2%   | -4,0 |        |       | 13,70 | 12,30 | 12,20 | 5,03  | 9,43  | 6,05  | 2,90  | 25,20 | 15,00  | 3  |
| 97  | w | 39 | 38,1 | 4 | RRYGB | 77  | 0  | 4 | 13,2%   | -1,7 |        |       | 12,30 | 11,50 | 12,20 | 8,47  | 10,81 | 8,88  | 13,60 | 23,90 | 40,10  | 4  |
| 98  | w | 62 | 40,0 | 4 | RRYGB | 99  | 0  | 3 | 25,4%   | -3,8 |        |       | 15,10 | 13,60 | 13,90 | 10,07 | 13,10 | 11,52 | 7,98  | 36,20 | 84,90  | 5  |
| 99  | w | 44 | 34,7 | 3 | RRYGB | 89  | 0  | 3 | 36,2%   | -3,5 |        |       | 14,10 | 12,40 | 12,10 | 11,47 | 11,40 | 10,11 | 5,68  | 16,40 | 31,70  | 5  |
| 100 | w | 44 | 49,2 | 4 | RRYGB | 161 | 0  | 4 | 14,3%   | -3,5 |        |       | 13,60 | 11,80 | 11,20 | 8,17  | 7,19  | 6,87  | 4,06  | 41,20 | 65,20  |    |
| 101 | w | 41 | 53,9 | 3 | RRYGB | 98  | 0  | 6 | 17,2%   | -5,0 |        |       | 15,10 | 14,10 | 14,00 | 11,22 | 14,33 | 9,28  | 20,50 | 36,60 | 48,10  | 3  |
| 102 | w | 42 | 44,8 | 2 | RRYGB | 87  | 0  | 3 | 18,5%   | -3,7 |        |       | 13,70 | 12,70 |       | 9,69  | 10,48 |       | 8,70  | 32,30 |        | 4  |
| 103 | w | 52 | 41,8 | 2 | RRYGB | 69  | 0  | 3 | 23,2%   | -3,9 |        |       | 14,30 | 11,50 | 12,50 | 6,22  | 9,06  | 10,96 | 21,40 | 47,50 | 104,00 | 5  |
| 104 | w | 38 | 54,9 | 2 | RRYGB | 77  | 0  | 4 | 17,3%</ |      |        |       |       |       |       |       |       |       |       |       |        |    |
